# Supplementary material for: SerraNA: a program to determine nucleic acids elasticity from simulation data
Source: Royal Society of Chemistry journal article supplement (doi:10.1039/d0cp02713h), 2020-01-01
Supplement: d0cp02713h1.pdf [file d0cp02713h1.pdf]

# Supplementary Material

## **SerraNA: a program to determine nucleic acids elasticity from simulation data**

Victor Velasco-Berrelleza,<sup>†</sup> Matthew Burman,<sup>†</sup> Jack W. Shepherd,<sup>†</sup> Mark C.  
Leake,<sup>†,‡</sup> Ramin Golestanian,<sup>¶,§</sup> and Agnes Noy<sup>\*,||</sup>

*Department of Physics, University of York, York, YO10 5DD, UK, Department of Biology,  
University of York, York, YO10 5NG, UK, Max Planck Institute for Dynamics and  
Self-Organization (MPIDS), Göttingen, 37077, Germany, Rudolf Peierls Centre for Theoretical  
Physics, University of Oxford, Oxford OX1 3PU, United Kingdom, and Department of Physics,  
Biological Physical Sciences Institute, University of York, York, YO10 5DD, UK*

E-mail: agnes.noy@york.ac.uk

---

\*To whom correspondence should be addressed

<sup>†</sup>Department of Physics, University of York, York, YO10 5DD, UK

<sup>‡</sup>Department of Biology, University of York, York, YO10 5NG, UK

<sup>¶</sup>Max Planck Institute for Dynamics and Self-Organization (MPIDS), Göttingen, 37077, Germany

<sup>§</sup>Rudolf Peierls Centre for Theoretical Physics, University of Oxford, Oxford OX1 3PU, United Kingdom

<sup>||</sup>Department of Physics, Biological Physical Sciences Institute, University of York, York, YO10 5DD, UK

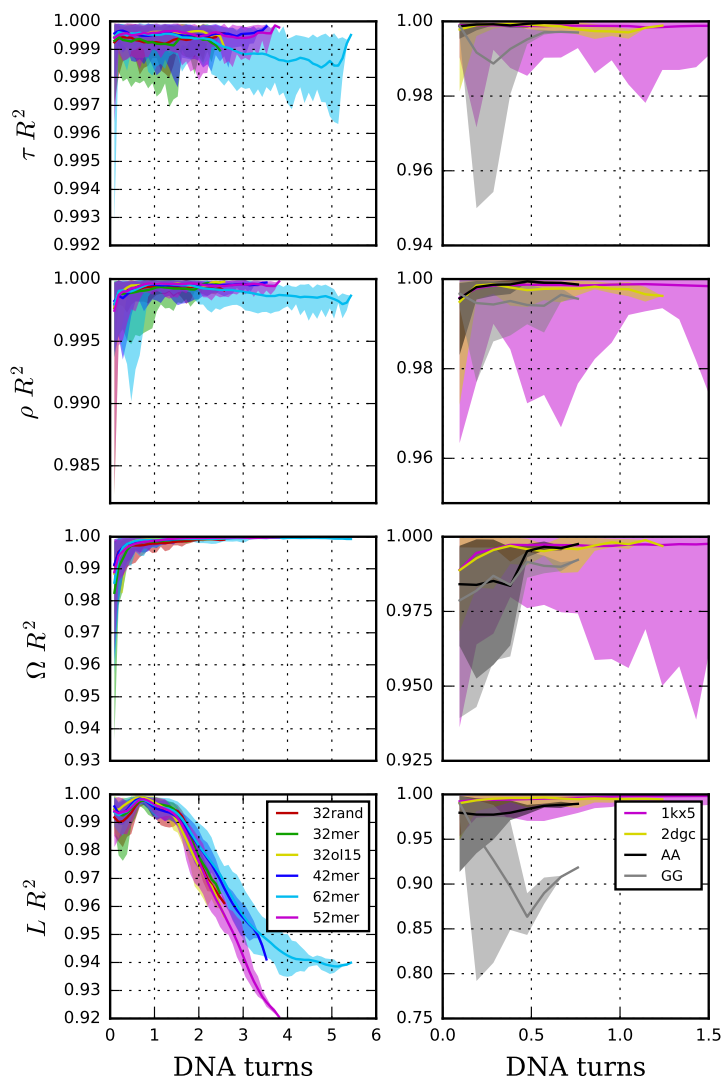

Figure 1: R-squared in linear fits of the quantile-quantile plots between real data against the estimated gaussian distributions for tilt ( $\tau$ ), roll ( $\rho$ ), twist ( $\Omega$ ) and end-to-end distance ( $L$ ). Lines correspond to averages and shade areas encompass maximum and minimum values for each sub-fragment length. Canonical relaxed DNAs (first column) can be broadly represented by normal distributions with the exception of (i) bimodal twists, which are only noticeable at the dinucleotide level, and (ii)  $L$  in long lengths due to its skewness on the distribution (Figure S2). Quadratic behaviour is significantly altered when DNA is perturbed by different factors (second column) including nucleosome formation (PDB 1kx5) and mismatches (AA and GG) (see Methods). Though, some protein-DNA complexes as the transcription factor GCN4 (PDB 2dgc) can still be described by the harmonic elastic model. Despite the failure of quadratic approximation on these singular DNAs, SerraNA can still provide some insights of how the different types of distortions modify the elasticity of DNA.

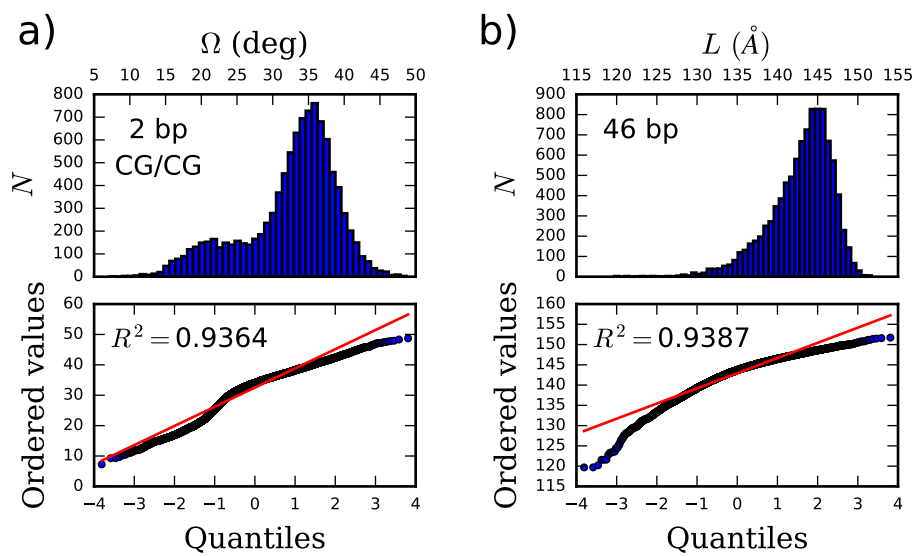

Figure 2: Histograms and quantile-quantile plots for the most non-gaussian cases on canonical relaxed DNAs, including (a) bimodal twist ( $\Omega$ ) for a CG bp step within the 32mer fragment, and (b) skewed end-to-end ( $L$ ) distribution for the longest analyzed sub-length (46 bp) from the 62mer fragment.

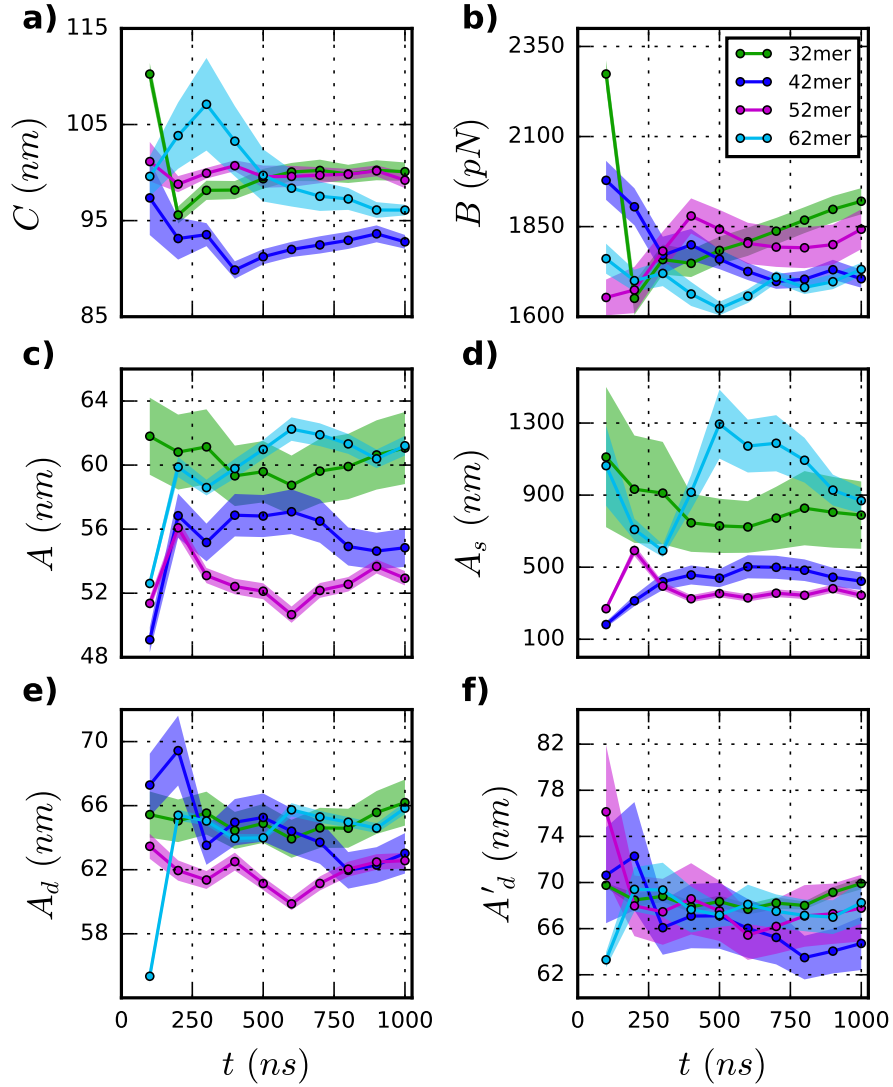

Figure 3: Elastic constants for twist  $C$ , stretch  $B$ , persistence length  $A$ , static persistence length  $A_s$ , dynamic persistence length  $A_d$  and a second prediction of the dynamic persistence length  $A'_d$  for increasing extensions (in ns) of the trajectories over DNA fragments containing 32 (green), 42 (blue), 52 (purple) and 62 (cyan) bp long. Shaded areas represent standard deviations in the case of  $C$  and  $A'_d$ , and uncertainty values with 70% of confidence level for variables obtained through linear fits ( $B, A, A_s$  and  $A_d$ ).

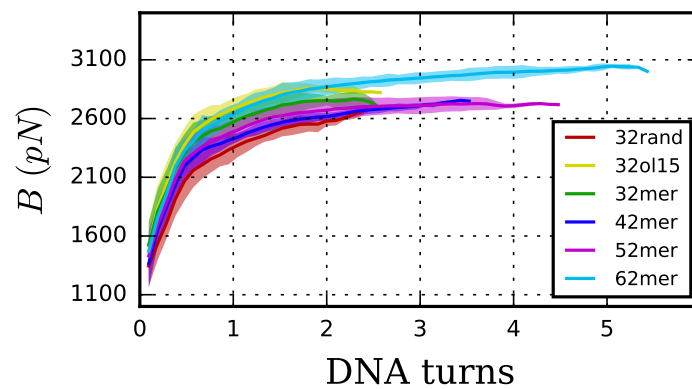

Figure 4: Stretch Modulus  $B$  at different lengths using contour length instead of end-to-end distance and including simulations for a 32bp random sequence (32rand) and the 32mer using par-mOL15 force field (32ol15) (see Methods).

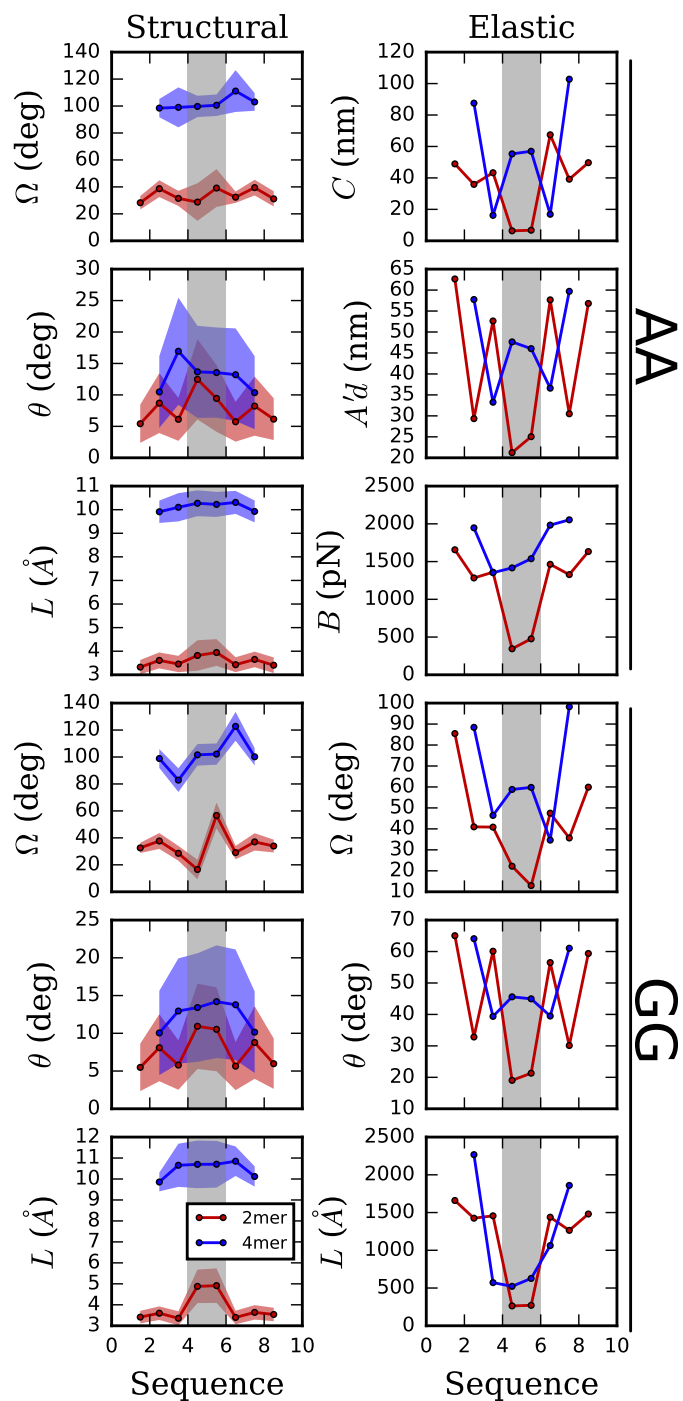

Figure 5: Structural (left) and elastic (right) profiles along the molecule for dimer and tetramer sub-lengths of trajectories containing an AA (top) and GG (bottom) mismatch, the localization of which is indicated by grey shade.

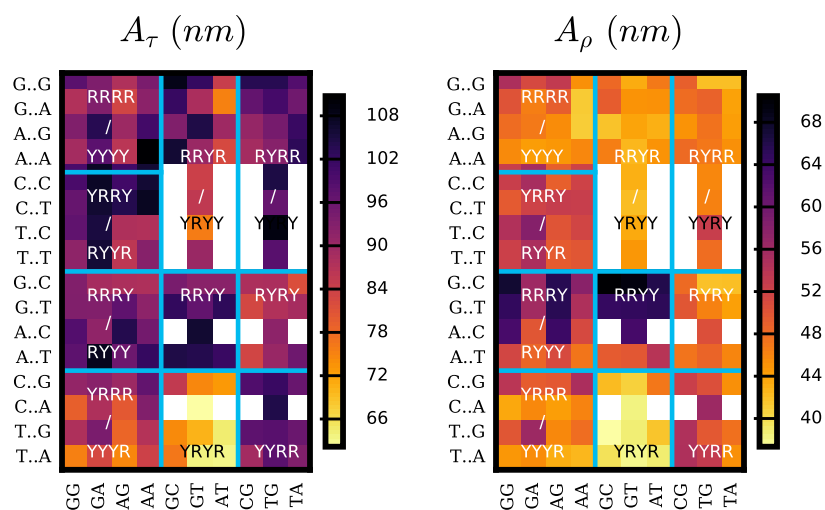

Figure 6: Roll and tilt persistence lengths ( $A_\rho$  and  $A_\tau$ , respectively) at the 4 bp length for the 136 tetranucleotide sequences from ABC simulation database. Vertical axis represent the flanking base-pairs and the horizontal axis represents the middle base-steps. Horizontal and vertical lines organize sequences according purine (R) or pyrimidine (Y) type. Sequence duplication is excluded through the use of white squares.

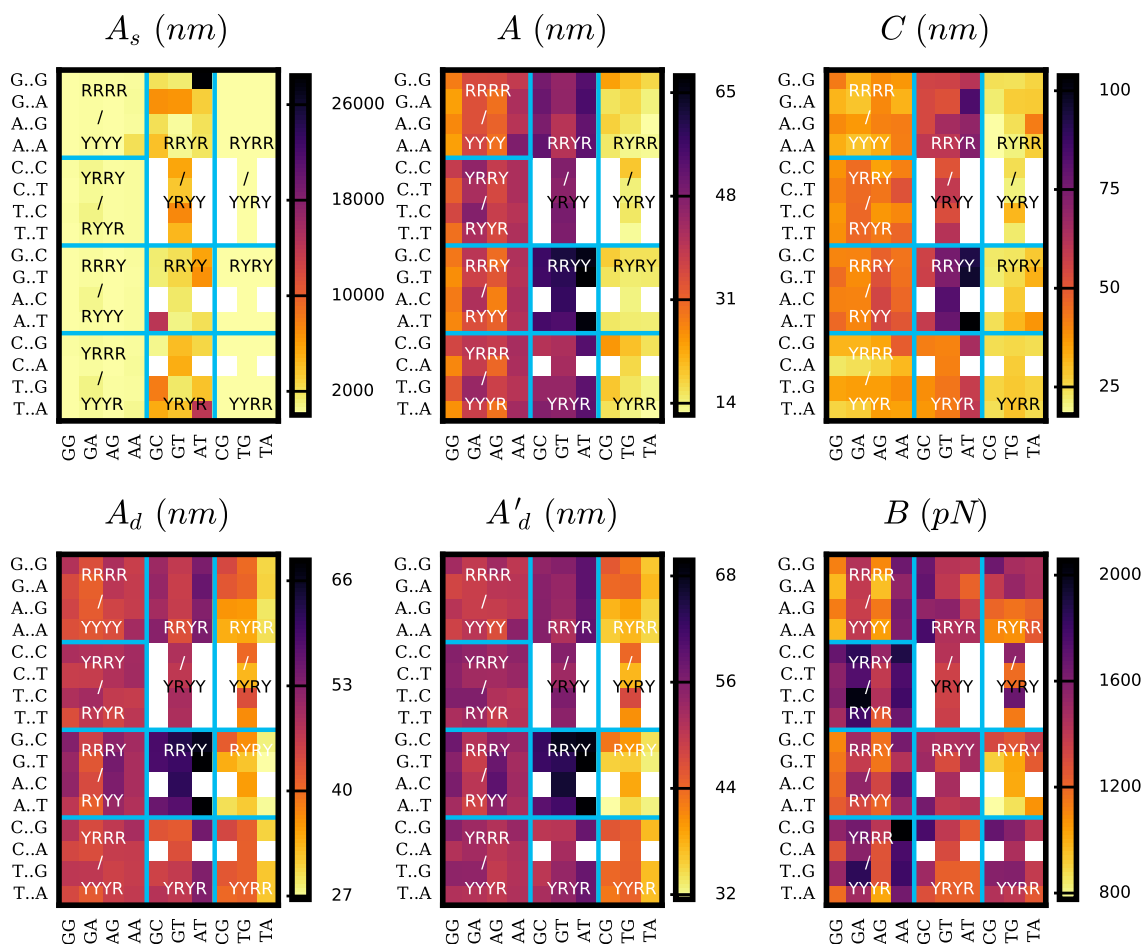

Figure 7: Elastic constants at the dinucleotide length for the whole set of 136 tetra-nucleotide sequences from ABC simulation database. Total persistence length together with its static and dynamic components ( $A$ ,  $A_s$  and  $A_d$ , respectively) are calculated using the directional decay at dimer level. Twist ( $C$ ), stretch modulus ( $B$ ) and the second estimation of dynamic persistence length ( $A'_d$ ) are obtained directly from the inverse-covariance matrix for dinucleotides. Vertical axis indicates middle steps, and horizontal axis flanking bases. Horizontal and vertical lines organize sequences according purine (R) or pyrimidine (Y) type. Sequence duplication is excluded through the use of white squares.



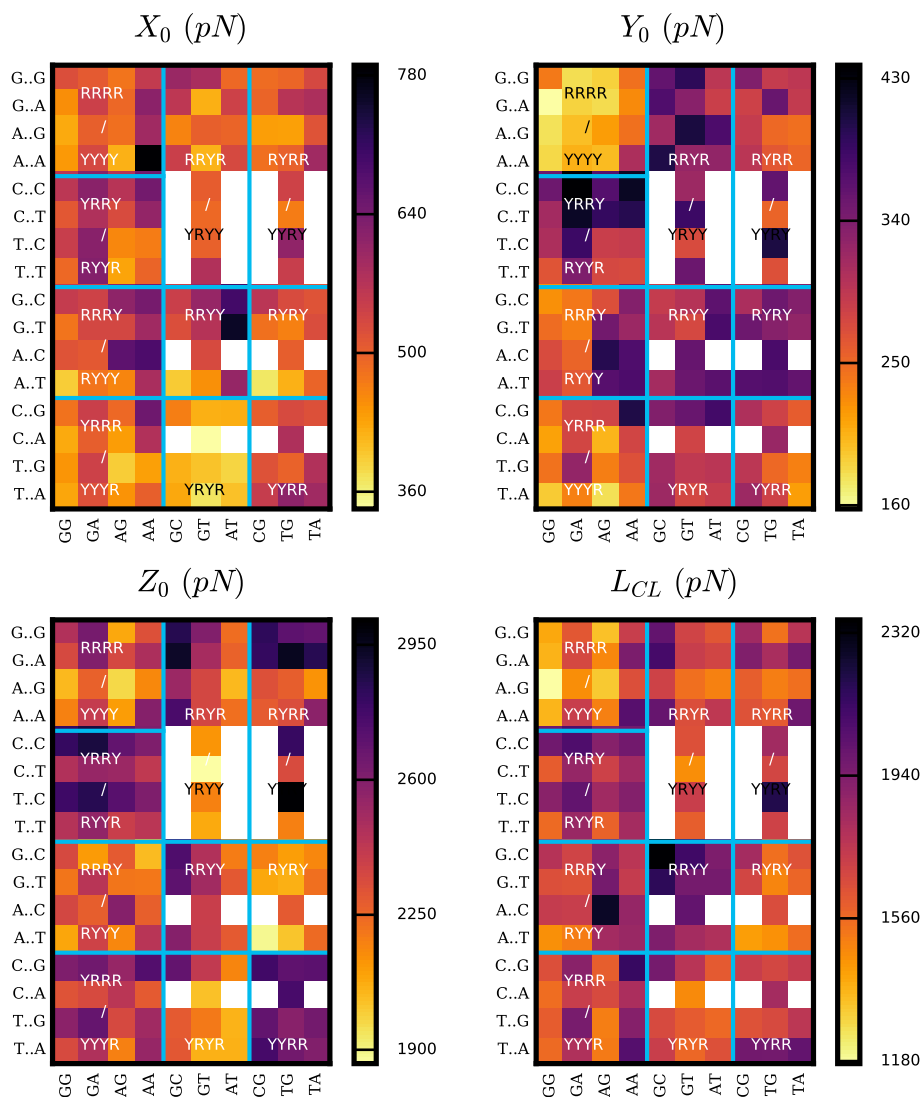

Figure 8: Added shift  $X_0$ , slide  $Y_0$ , rise  $Z_0$  and contour length  $L_{CL}$  elastic constants at the 4 bp length for the 136 tetranucleotide sequences from ABC simulation database. Vertical axis represent the flanking base-pairs and the horizontal axis represents the middle base-steps. Horizontal and vertical lines organize sequences according purine (R) or pyrimidine (Y) type. Sequence duplication is excluded through the use of white squares.

Table 1: Two versions of dynamics persistence length ( $A'_d$  and  $A''_d$ ) estimated from unconstrained MD trajectories over linear DNA fragments and calculated following equation 9 and 11, respectively, as in Table 1 in the main manuscript.

|         | $A'_d$         | $A''_d$         |
|---------|----------------|-----------------|
| 32rand  | $68.3 \pm 1.0$ | $68.04 \pm 1.0$ |
| 32mer   | $69.9 \pm 0.5$ | $69.2 \pm 0.6$  |
| 42mer   | $64.7 \pm 2.3$ | $64.4 \pm 2.4$  |
| 52mer   | $67.8 \pm 2.9$ | $67.1 \pm 3.0$  |
| 62mer   | $68.2 \pm 1.8$ | $67.9 \pm 1.9$  |
| Average | $67.8 \pm 1.7$ | $67.3 \pm 1.8$  |

Table 2: Persistence length  $A$ , its static  $A_s$  and dynamic  $A_d$  components and twist  $C$  and stretch modulus  $B$  of RRRR tetranucleotide sequences.

| Sequence | $A$ (nm)       | $A_d$ (nm)     | $A_s$ (nm)        | $C$ (nm)       | $B$ (pN)       |
|----------|----------------|----------------|-------------------|----------------|----------------|
| GGGG     | $19.0 \pm 0.6$ | $65.4 \pm 2.6$ | $26.9 \pm 1.1$    | $79.1 \pm 6.4$ | $1541 \pm 47$  |
| GGGA     | $24.0 \pm 0.7$ | $57.9 \pm 1.1$ | $41.0 \pm 2.2$    | $65.8 \pm 2.0$ | $1411 \pm 34$  |
| AGGG     | $18.0 \pm 0.5$ | $59.3 \pm 1.7$ | $25.8 \pm 0.7$    | $63.7 \pm 3.1$ | $1188 \pm 26$  |
| AGGA     | $23.5 \pm 2.2$ | $57.2 \pm 0.8$ | $40.3 \pm 6.3$    | $61.0 \pm 0.8$ | $1358 \pm 39$  |
| GGAG     | $31.9 \pm 0.6$ | $60.7 \pm 1.1$ | $67.6 \pm 3.9$    | $69.3 \pm 2.1$ | $1863 \pm 6$   |
| GGAA     | $36.7 \pm 0.6$ | $55.5 \pm 0.7$ | $108.1 \pm 2.7$   | $74.5 \pm 4.9$ | $1844 \pm 44$  |
| AGAG     | $25.5 \pm 2.1$ | $60.5 \pm 1.0$ | $44.5 \pm 6.4$    | $66.9 \pm 4.8$ | $1637 \pm 78$  |
| AGAA     | $35.4 \pm 5.0$ | $55.0 \pm 4.3$ | $101.8 \pm 26.9$  | $66.7 \pm 1.7$ | $1863 \pm 136$ |
| GAGG     | $23.3 \pm 1.6$ | $60.6 \pm 0.9$ | $37.9 \pm 3.8$    | $58.6 \pm 1.6$ | $1652 \pm 122$ |
| GAGA     | $27.7 \pm 0.8$ | $57.6 \pm 0.5$ | $53.4 \pm 3.0$    | $60.1 \pm 1.7$ | $1603 \pm 38$  |
| AAGG     | $21.2 \pm 1.0$ | $56.8 \pm 0.5$ | $34.0 \pm 2.7$    | $59.2 \pm 4.5$ | $1311 \pm 23$  |
| AAGA     | $27.4 \pm 4.7$ | $56.6 \pm 2.6$ | $54.7 \pm 14.7$   | $51.8 \pm 8.4$ | $1581 \pm 84$  |
| GAAG     | $34.9 \pm 1.3$ | $55.4 \pm 0.5$ | $95.6 \pm 10.6$   | $61.3 \pm 1.4$ | $2028 \pm 109$ |
| GAAA     | $46.9 \pm 0.1$ | $52.3 \pm 0.1$ | $454.1 \pm 20.1$  | $61.5 \pm 2.0$ | $2127 \pm 24$  |
| AAAG     | $33.7 \pm 0.4$ | $54.6 \pm 1.1$ | $87.8 \pm 0.1$    | $56.8 \pm 3.0$ | $1754 \pm 47$  |
| AAAA     | $55.8 \pm 7.0$ | $61.6 \pm 3.4$ | $970.0 \pm 506.1$ | $74.6 \pm 6.6$ | $2241 \pm 88$  |
| Average  | $30.3 \pm 9.9$ | $57.9 \pm 3.2$ | $140.2 \pm 236.0$ | $64.4 \pm 7.0$ | $1688 \pm 288$ |

Table 3: Persistence length  $A$ , its static  $A_s$  and dynamic  $A_d$  components and twist  $C$  and stretch modulus  $B$  of YRRY tetranucleotide sequences.

| Sequence | $A$ (nm)       | $A_d$ (nm)     | $A_s$ (nm)       | $C$ (nm)       | $B$ (pN)       |
|----------|----------------|----------------|------------------|----------------|----------------|
| TGGT     | $19.6 \pm 0.8$ | $61.1 \pm 3.8$ | $28.8 \pm 1.0$   | $72.9 \pm 5.4$ | $1700 \pm 109$ |
| TGGC     | $28.4 \pm 2.2$ | $65.5 \pm 2.4$ | $50.4 \pm 5.4$   | $69.9 \pm 2.1$ | $2139 \pm 82$  |
| CGGT     | $23.0 \pm 0.5$ | $62.7 \pm 2.5$ | $36.4 \pm 0.6$   | $69.0 \pm 4.5$ | $2072 \pm 88$  |
| CGGC     | $32.7 \pm 0.6$ | $66.2 \pm 2.3$ | $64.9 \pm 2.6$   | $65.8 \pm 2.7$ | $2468 \pm 82$  |
| TGAT     | $28.5 \pm 1.6$ | $68.7 \pm 3.4$ | $48.8 \pm 3.2$   | $82.3 \pm 2.5$ | $2153 \pm 118$ |
| TGAC     | $42.3 \pm 1.7$ | $70.1 \pm 1.9$ | $106.7 \pm 6.6$  | $81.0 \pm 0.4$ | $2470 \pm 39$  |
| CGAT     | $33.6 \pm 0.7$ | $68.1 \pm 0.7$ | $66.5 \pm 2.9$   | $68.3 \pm 2.8$ | $2421 \pm 44$  |
| CGAC     | $41.5 \pm 1.2$ | $69.0 \pm 2.7$ | $104.2 \pm 1.7$  | $74.1 \pm 1.4$ | $2754 \pm 65$  |
| TAGT     | $24.0 \pm 1.9$ | $57.2 \pm 2.8$ | $41.4 \pm 4.3$   | $68.0 \pm 4.9$ | $1771 \pm 62$  |
| TAGC     | $33.1 \pm 0.8$ | $57.4 \pm 0.9$ | $78.1 \pm 3.7$   | $65.4 \pm 1.9$ | $2119 \pm 49$  |
| CAGT     | $30.9 \pm 1.1$ | $66.9 \pm 1.8$ | $57.6 \pm 3.2$   | $78.2 \pm 1.8$ | $2097 \pm 26$  |
| CAGC     | $35.5 \pm 1.7$ | $62.8 \pm 2.4$ | $81.8 \pm 5.4$   | $70.2 \pm 2.0$ | $2329 \pm 70$  |
| TAAT     | $31.6 \pm 2.5$ | $57.4 \pm 2.3$ | $70.7 \pm 9.0$   | $69.5 \pm 2.0$ | $1923 \pm 68$  |
| TAAC     | $38.8 \pm 3.6$ | $56.8 \pm 2.4$ | $124.0 \pm 23.3$ | $72.0 \pm 2.6$ | $2171 \pm 16$  |
| CAAT     | $36.6 \pm 2.5$ | $67.4 \pm 2.9$ | $80.2 \pm 7.9$   | $80.5 \pm 2.4$ | $2147 \pm 81$  |
| CAAC     | $44.6 \pm 1.6$ | $65.5 \pm 2.4$ | $139.7 \pm 5.9$  | $81.5 \pm 0.9$ | $2347 \pm 125$ |
| Average  | $32.8 \pm 6.9$ | $63.9 \pm 4.5$ | $73.8 \pm 30.7$  | $73.0 \pm 5.7$ | $2193 \pm 261$ |

Table 4: Persistence length  $A$ , its static  $A_s$  and dynamic  $A_d$  components and twist  $C$  and stretch modulus  $B$  of RRRY tetranucleotide sequences.

| Sequence | $A$ (nm)       | $A_d$ (nm)     | $A_s$ (nm)        | $C$ (nm)       | $B$ (pN)       |
|----------|----------------|----------------|-------------------|----------------|----------------|
| GGGT     | $29.7 \pm 1.3$ | $60.8 \pm 0.2$ | $58.5 \pm 5.3$    | $58.4 \pm 1.2$ | $1682 \pm 113$ |
| GGGC     | $35.9 \pm 2.2$ | $64.9 \pm 2.2$ | $80.5 \pm 7.8$    | $61.5 \pm 2.0$ | $1861 \pm 105$ |
| AGGT     | $33.5 \pm 1.7$ | $56.7 \pm 2.0$ | $82.3 \pm 7.8$    | $60.5 \pm 0.1$ | $1498 \pm 82$  |
| AGGC     | $36.5 \pm 0.7$ | $63.3 \pm 1.4$ | $86.5 \pm 4.7$    | $61.0 \pm 3.0$ | $1833 \pm 71$  |
| GGAT     | $36.4 \pm 0.6$ | $57.6 \pm 0.4$ | $99.1 \pm 5.8$    | $63.9 \pm 0.7$ | $1670 \pm 69$  |
| GGAC     | $41.9 \pm 2.1$ | $56.0 \pm 0.9$ | $169.0 \pm 25.4$  | $55.8 \pm 0.0$ | $1938 \pm 46$  |
| AGAT     | $33.7 \pm 0.4$ | $57.6 \pm 0.4$ | $81.5 \pm 3.3$    | $74.0 \pm 1.8$ | $1589 \pm 28$  |
| AGAC     | $41.6 \pm 1.3$ | $56.1 \pm 0.3$ | $163.2 \pm 22.0$  | $57.1 \pm 0.5$ | $1923 \pm 52$  |
| GAGT     | $50.0 \pm 2.2$ | $64.5 \pm 1.2$ | $233.9 \pm 55.2$  | $63.2 \pm 2.6$ | $2219 \pm 34$  |
| GAGC     | $37.4 \pm 0.8$ | $62.8 \pm 2.3$ | $93.5 \pm 9.3$    | $59.2 \pm 2.4$ | $2072 \pm 24$  |
| AAGT     | $43.3 \pm 1.6$ | $57.6 \pm 2.0$ | $174.5 \pm 6.7$   | $62.8 \pm 1.6$ | $1993 \pm 15$  |
| AAGC     | $40.8 \pm 0.6$ | $69.5 \pm 1.4$ | $99.1 \pm 0.8$    | $79.8 \pm 3.1$ | $2551 \pm 52$  |
| GAAT     | $51.0 \pm 2.4$ | $57.0 \pm 2.0$ | $484.7 \pm 69.6$  | $54.8 \pm 4.2$ | $1981 \pm 25$  |
| GAAC     | $52.5 \pm 2.7$ | $58.7 \pm 3.1$ | $496.5 \pm 18.6$  | $56.7 \pm 2.2$ | $2155 \pm 97$  |
| AAAT     | $53.9 \pm 0.2$ | $59.2 \pm 0.9$ | $613.0 \pm 78.7$  | $62.5 \pm 1.0$ | $2185 \pm 8$   |
| AAAC     | $50.4 \pm 0.7$ | $59.7 \pm 1.6$ | $327.7 \pm 17.1$  | $57.1 \pm 2.4$ | $2203 \pm 47$  |
| Average  | $41.8 \pm 7.4$ | $60.1 \pm 3.7$ | $209.0 \pm 170.6$ | $61.8 \pm 6.4$ | $1960 \pm 264$ |

Table 5: Persistence length  $A$ , its static  $A_s$  and dynamic  $A_d$  components and twist  $C$  and stretch modulus  $B$  of YRRR tetranucleotide sequences.

| Sequence | $A$ (nm)       | $A_d$ (nm)     | $A_s$ (nm)      | $C$ (nm)       | $B$ (pN)       |
|----------|----------------|----------------|-----------------|----------------|----------------|
| TGGG     | $17.1 \pm 0.3$ | $59.8 \pm 1.0$ | $24.0 \pm 0.5$  | $60.6 \pm 1.7$ | $1673 \pm 67$  |
| TGGA     | $18.0 \pm 1.0$ | $52.5 \pm 0.8$ | $27.6 \pm 2.4$  | $62.0 \pm 0.8$ | $1695 \pm 82$  |
| CGGG     | $21.5 \pm 1.4$ | $65.4 \pm 0.8$ | $32.2 \pm 2.9$  | $56.6 \pm 2.5$ | $1974 \pm 40$  |
| CGGA     | $21.9 \pm 0.7$ | $54.5 \pm 0.6$ | $36.6 \pm 2.0$  | $51.6 \pm 1.9$ | $2000 \pm 44$  |
| TGAG     | $33.2 \pm 1.0$ | $65.5 \pm 2.2$ | $67.3 \pm 2.2$  | $72.7 \pm 2.7$ | $2335 \pm 100$ |
| TGAA     | $28.0 \pm 0.5$ | $54.9 \pm 1.8$ | $57.5 \pm 3.1$  | $69.0 \pm 1.1$ | $2044 \pm 28$  |
| CGAG     | $27.6 \pm 0.7$ | $61.9 \pm 0.8$ | $50.0 \pm 2.3$  | $69.3 \pm 1.5$ | $2377 \pm 65$  |
| CGAA     | $31.6 \pm 0.6$ | $57.6 \pm 2.2$ | $70.2 \pm 1.0$  | $54.3 \pm 1.3$ | $2357 \pm 100$ |
| TAGG     | $20.1 \pm 0.7$ | $52.6 \pm 1.9$ | $32.7 \pm 1.2$  | $59.8 \pm 3.9$ | $1663 \pm 43$  |
| TAGA     | $16.8 \pm 0.3$ | $49.5 \pm 0.6$ | $25.5 \pm 0.8$  | $74.1 \pm 3.3$ | $1593 \pm 40$  |
| CAGG     | $23.0 \pm 1.3$ | $60.9 \pm 1.6$ | $36.9 \pm 2.9$  | $63.5 \pm 2.1$ | $1996 \pm 23$  |
| CAGA     | $22.4 \pm 0.3$ | $54.3 \pm 0.4$ | $38.1 \pm 0.8$  | $60.5 \pm 2.4$ | $1958 \pm 83$  |
| TAAG     | $32.2 \pm 1.5$ | $55.8 \pm 1.5$ | $76.5 \pm 6.9$  | $67.5 \pm 1.8$ | $2186 \pm 49$  |
| TAAA     | $35.0 \pm 0.9$ | $51.4 \pm 2.2$ | $110.4 \pm 9.5$ | $75.7 \pm 1.8$ | $2161 \pm 63$  |
| CAAG     | $35.1 \pm 1.6$ | $66.9 \pm 2.1$ | $73.7 \pm 4.9$  | $81.2 \pm 5.1$ | $2566 \pm 110$ |
| CAAA     | $34.6 \pm 0.1$ | $58.0 \pm 0.7$ | $85.5 \pm 1.3$  | $65.1 \pm 3.2$ | $2060 \pm 87$  |
| Average  | $26.1 \pm 6.5$ | $57.6 \pm 5.2$ | $52.8 \pm 24.6$ | $65.2 \pm 7.9$ | $2040 \pm 276$ |

Table 6: Persistence length  $A$ , its static  $A_s$  and dynamic  $A_d$  components and twist  $C$  and stretch modulus  $B$  of RRYR /YRY Y tetranucleotide sequences.

| Sequence | $A$ (nm)       | $A_d$ (nm)     | $A_s$ (nm)      | $C$ (nm)       | $B$ (pN)       |
|----------|----------------|----------------|-----------------|----------------|----------------|
| GGTG     | $30.4 \pm 0.1$ | $57.6 \pm 0.8$ | $64.1 \pm 0.7$  | $66.0 \pm 2.0$ | $2076 \pm 68$  |
| GGTA     | $29.2 \pm 0.1$ | $52.6 \pm 0.6$ | $65.8 \pm 0.4$  | $61.1 \pm 0.9$ | $1783 \pm 53$  |
| AGTG     | $29.2 \pm 0.7$ | $59.5 \pm 1.3$ | $57.5 \pm 2.4$  | $66.0 \pm 3.2$ | $1996 \pm 74$  |
| AGTA     | $22.7 \pm 2.1$ | $51.7 \pm 1.5$ | $40.6 \pm 5.7$  | $56.5 \pm 3.2$ | $1854 \pm 13$  |
| TGTT     | $22.8 \pm 0.1$ | $58.9 \pm 0.1$ | $37.2 \pm 0.2$  | $52.5 \pm 1.9$ | $1832 \pm 28$  |
| TGTC     | $26.1 \pm 1.5$ | $53.4 \pm 0.7$ | $51.3 \pm 6.0$  | $48.8 \pm 1.3$ | $2035 \pm 114$ |
| CGTT     | $24.6 \pm 0.1$ | $57.2 \pm 0.1$ | $43.1 \pm 0.3$  | $41.1 \pm 0.3$ | $1931 \pm 10$  |
| CGTC     | $26.6 \pm 2.5$ | $57.0 \pm 0.6$ | $50.7 \pm 8.4$  | $43.8 \pm 1.8$ | $2309 \pm 108$ |
| GGCG     | $31.5 \pm 0.3$ | $65.2 \pm 0.3$ | $61.1 \pm 0.9$  | $56.3 \pm 0.6$ | $2462 \pm 27$  |
| GGCA     | $28.1 \pm 0.0$ | $63.4 \pm 1.3$ | $50.4 \pm 0.9$  | $57.8 \pm 0.3$ | $2293 \pm 41$  |
| AGCG     | $22.2 \pm 3.1$ | $56.6 \pm 4.6$ | $38.8 \pm 12.4$ | $60.5 \pm 3.1$ | $2171 \pm 149$ |
| AGCA     | $19.8 \pm 1.1$ | $63.1 \pm 3.6$ | $29.0 \pm 1.6$  | $66.1 \pm 6.9$ | $2266 \pm 46$  |
| GATG     | $25.8 \pm 3.5$ | $56.2 \pm 0.4$ | $49.0 \pm 11.4$ | $52.4 \pm 2.9$ | $2142 \pm 191$ |
| GATA     | $20.9 \pm 0.5$ | $48.5 \pm 0.2$ | $36.7 \pm 1.4$  | $65.4 \pm 1.3$ | $1678 \pm 74$  |
| AATG     | $24.5 \pm 0.7$ | $56.0 \pm 0.2$ | $43.6 \pm 2.3$  | $48.7 \pm 1.1$ | $1714 \pm 43$  |
| AATA     | $25.8 \pm 0.5$ | $52.2 \pm 1.7$ | $50.9 \pm 0.3$  | $56.2 \pm 0.8$ | $1799 \pm 6$   |
| Average  | $25.6 \pm 3.3$ | $56.8 \pm 4.4$ | $48.1 \pm 10.2$ | $56.2 \pm 7.7$ | $2021 \pm 229$ |

Table 7: Persistence length  $A$ , its static  $A_s$  and dynamic  $A_d$  components and twist  $C$  and stretch modulus  $B$  of RRYT tetranucleotide sequences.

| Sequence | $A$ (nm)       | $A_d$ (nm)     | $A_s$ (nm)         | $C$ (nm)       | $B$ (pN)       |
|----------|----------------|----------------|--------------------|----------------|----------------|
| GGTT     | $38.4 \pm 0.4$ | $65.8 \pm 0.8$ | $92.4 \pm 0.9$     | $54.5 \pm 0.1$ | $2255 \pm 24$  |
| GGTC     | $44.5 \pm 0.1$ | $65.6 \pm 0.5$ | $138.4 \pm 3.3$    | $65.1 \pm 1.2$ | $2493 \pm 1$   |
| AGTT     | $48.2 \pm 0.7$ | $60.8 \pm 0.9$ | $232.1 \pm 3.2$    | $56.4 \pm 0.4$ | $2179 \pm 12$  |
| AGTC     | $50.2 \pm 5.8$ | $68.3 \pm 1.5$ | $205.5 \pm 65.0$   | $62.3 \pm 1.9$ | $2533 \pm 59$  |
| GGCT     | $42.1 \pm 0.3$ | $65.2 \pm 0.6$ | $118.9 \pm 3.9$    | $55.7 \pm 2.3$ | $2527 \pm 28$  |
| GGCC     | $44.1 \pm 0.4$ | $65.3 \pm 0.0$ | $136.3 \pm 4.0$    | $60.7 \pm 1.6$ | $2677 \pm 18$  |
| AGCT     | $41.5 \pm 1.8$ | $58.8 \pm 1.4$ | $141.7 \pm 12.7$   | $55.4 \pm 0.5$ | $2314 \pm 67$  |
| GATT     | $59.4 \pm 0.5$ | $70.7 \pm 0.3$ | $370.7 \pm 11.9$   | $65.2 \pm 2.6$ | $2413 \pm 49$  |
| GATC     | $58.1 \pm 0.4$ | $65.9 \pm 0.3$ | $495.3 \pm 17.6$   | $66.7 \pm 0.9$ | $2339 \pm 15$  |
| AATT     | $61.7 \pm 1.0$ | $64.9 \pm 0.7$ | $1267.1 \pm 144.2$ | $57.9 \pm 0.9$ | $2209 \pm 16$  |
| Average  | $48.8 \pm 7.8$ | $65.1 \pm 3.2$ | $319.8 \pm 337.9$  | $60.0 \pm 4.4$ | $2394 \pm 154$ |

Table 8: Persistence length  $A$ , its static  $A_s$  and dynamic  $A_d$  components and twist  $C$  and stretch modulus  $B$  of YRYR tetranucleotide sequences.

| Sequence | $A$ (nm)       | $A_d$ (nm)     | $A_s$ (nm)     | $C$ (nm)       | $B$ (pN)       |
|----------|----------------|----------------|----------------|----------------|----------------|
| TGTG     | $17.5 \pm 0.9$ | $47.4 \pm 2.1$ | $28.0 \pm 3.1$ | $54.7 \pm 4.5$ | $1847 \pm 136$ |
| TGTA     | $17.5 \pm 0.4$ | $43.3 \pm 0.9$ | $29.3 \pm 0.9$ | $64.6 \pm 4.3$ | $1682 \pm 40$  |
| CGTG     | $19.9 \pm 0.1$ | $51.3 \pm 0.8$ | $32.7 \pm 0.5$ | $54.5 \pm 1.5$ | $2173 \pm 51$  |
| CGTA     | $19.0 \pm 0.5$ | $44.0 \pm 1.0$ | $33.6 \pm 2.0$ | $50.9 \pm 3.5$ | $1749 \pm 52$  |
| TGCG     | $18.9 \pm 0.3$ | $48.8 \pm 0.9$ | $30.7 \pm 0.9$ | $50.8 \pm 1.8$ | $2095 \pm 53$  |
| TGCA     | $15.1 \pm 0.1$ | $49.7 \pm 0.3$ | $21.7 \pm 0.2$ | $69.7 \pm 1.1$ | $1850 \pm 30$  |
| CGCG     | $25.6 \pm 0.7$ | $56.4 \pm 1.9$ | $47.1 \pm 2.6$ | $52.1 \pm 1.0$ | $2660 \pm 63$  |
| TATG     | $17.7 \pm 0.8$ | $43.9 \pm 0.3$ | $29.8 \pm 2.3$ | $60.6 \pm 0.2$ | $1676 \pm 12$  |
| TATA     | $17.6 \pm 0.8$ | $41.1 \pm 0.8$ | $31.0 \pm 2.8$ | $70.1 \pm 4.1$ | $1672 \pm 30$  |
| CATG     | $16.3 \pm 0.5$ | $53.2 \pm 0.9$ | $23.6 \pm 0.9$ | $60.4 \pm 0.2$ | $1887 \pm 38$  |
| Average  | $18.5 \pm 2.7$ | $47.9 \pm 4.6$ | $30.8 \pm 6.5$ | $58.9 \pm 7.0$ | $1929 \pm 293$ |

Table 9: Persistence length  $A$ , its static  $A_s$  and dynamic  $A_d$  components and twist  $C$  and stretch modulus  $B$  of RYRR/YYRY tetranucleotide sequences.

| Sequence | $A$ (nm)       | $A_d$ (nm)     | $A_s$ (nm)       | $C$ (nm)       | $B$ (pN)       |
|----------|----------------|----------------|------------------|----------------|----------------|
| GTGG     | $30.0 \pm 0.6$ | $56.0 \pm 1.7$ | $64.9 \pm 0.6$   | $85.1 \pm 1.6$ | $2271 \pm 131$ |
| GTGA     | $46.1 \pm 0.6$ | $61.5 \pm 0.2$ | $184.6 \pm 7.5$  | $92.2 \pm 1.8$ | $2645 \pm 14$  |
| ATGG     | $20.7 \pm 1.4$ | $59.9 \pm 1.2$ | $31.7 \pm 3.7$   | $79.3 \pm 0.8$ | $1746 \pm 203$ |
| ATGA     | $26.6 \pm 1.2$ | $59.1 \pm 1.1$ | $48.7 \pm 4.1$   | $83.3 \pm 0.6$ | $1875 \pm 54$  |
| TTGT     | $29.6 \pm 1.4$ | $61.3 \pm 2.1$ | $57.3 \pm 3.5$   | $74.4 \pm 5.4$ | $1898 \pm 31$  |
| TTGC     | $43.6 \pm 2.1$ | $67.8 \pm 1.3$ | $122.6 \pm 13.1$ | $93.4 \pm 1.7$ | $2829 \pm 164$ |
| CTGT     | $24.0 \pm 0.7$ | $59.9 \pm 0.4$ | $40.1 \pm 1.9$   | $81.7 \pm 2.5$ | $1889 \pm 52$  |
| CTGC     | $37.9 \pm 0.4$ | $62.1 \pm 2.4$ | $97.7 \pm 4.1$   | $82.2 \pm 6.3$ | $2497 \pm 87$  |
| GTAG     | $34.9 \pm 2.2$ | $54.9 \pm 3.0$ | $96.1 \pm 7.4$   | $81.1 \pm 4.5$ | $2147 \pm 148$ |
| GTAA     | $40.3 \pm 2.6$ | $54.0 \pm 1.3$ | $161.7 \pm 28.9$ | $84.9 \pm 1.4$ | $2378 \pm 111$ |
| ATAG     | $19.7 \pm 0.5$ | $55.9 \pm 0.5$ | $30.4 \pm 1.2$   | $97.3 \pm 2.7$ | $1504 \pm 23$  |
| ATAA     | $32.0 \pm 3.2$ | $54.4 \pm 1.0$ | $79.7 \pm 16.8$  | $83.8 \pm 3.5$ | $1919 \pm 58$  |
| GCGG     | $32.6 \pm 0.1$ | $65.2 \pm 2.1$ | $65.5 \pm 2.4$   | $69.3 \pm 6.4$ | $2659 \pm 116$ |
| GCGA     | $30.2 \pm 0.1$ | $62.5 \pm 0.3$ | $58.5 \pm 0.8$   | $87.1 \pm 1.2$ | $2503 \pm 66$  |
| ACGG     | $21.7 \pm 0.8$ | $60.0 \pm 0.9$ | $34.0 \pm 2.0$   | $74.4 \pm 1.3$ | $2050 \pm 116$ |
| ACGA     | $26.9 \pm 0.9$ | $62.0 \pm 1.5$ | $47.4 \pm 2.0$   | $62.0 \pm 1.4$ | $2111 \pm 48$  |
| Average  | $31.1 \pm 7.7$ | $59.8 \pm 3.8$ | $76.3 \pm 44.6$  | $82.0 \pm 8.7$ | $2183 \pm 363$ |

Table 10: Persistence length  $A$ , its static  $A_s$  and dynamic  $A_d$  components and twist  $C$  and stretch modulus  $B$  of RYRY tetranucleotide sequences.

| Sequence | $A$ (nm)       | $A_d$ (nm)     | $A_s$ (nm)       | $C$ (nm)        | $B$ (pN)       |
|----------|----------------|----------------|------------------|-----------------|----------------|
| GTGT     | $29.6 \pm 1.3$ | $55.7 \pm 0.7$ | $63.2 \pm 5.4$   | $72.6 \pm 1.9$  | $1599 \pm 47$  |
| GTGC     | $35.1 \pm 0.2$ | $53.9 \pm 0.8$ | $100.8 \pm 4.3$  | $70.7 \pm 1.7$  | $2014 \pm 38$  |
| ATGT     | $31.0 \pm 0.4$ | $56.4 \pm 0.6$ | $69.0 \pm 0.8$   | $83.8 \pm 3.7$  | $1455 \pm 54$  |
| ATGC     | $29.4 \pm 1.0$ | $59.8 \pm 1.7$ | $58.5 \pm 6.0$   | $79.7 \pm 3.4$  | $1785 \pm 106$ |
| GTAT     | $30.6 \pm 0.7$ | $50.3 \pm 0.0$ | $78.4 \pm 4.6$   | $91.0 \pm 0.1$  | $1550 \pm 22$  |
| GTAC     | $31.5 \pm 0.2$ | $49.0 \pm 0.1$ | $88.0 \pm 2.2$   | $82.2 \pm 3.1$  | $1792 \pm 78$  |
| ATAT     | $31.6 \pm 0.9$ | $51.9 \pm 1.1$ | $81.0 \pm 4.9$   | $97.5 \pm 3.8$  | $1448 \pm 22$  |
| GCGT     | $34.0 \pm 0.5$ | $56.7 \pm 0.7$ | $85.0 \pm 1.8$   | $58.6 \pm 1.2$  | $2047 \pm 37$  |
| GCGC     | $46.4 \pm 1.7$ | $57.7 \pm 0.8$ | $239.7 \pm 31.4$ | $59.9 \pm 1.5$  | $2642 \pm 90$  |
| ACGT     | $30.9 \pm 1.7$ | $54.9 \pm 0.7$ | $71.2 \pm 8.5$   | $65.8 \pm 1.6$  | $1569 \pm 41$  |
| Average  | $33.0 \pm 4.8$ | $54.6 \pm 3.2$ | $93.5 \pm 50.2$  | $76.2 \pm 12.3$ | $1790 \pm 349$ |

Table 11: Persistence length  $A$ , its static  $A_s$  and dynamic  $A_d$  components and twist  $C$  and stretch modulus  $B$  of YYRR tetranucleotide sequences.

| Sequence | $A$ (nm)       | $A_d$ (nm)     | $A_s$ (nm)      | $C$ (nm)       | $B$ (pN)       |
|----------|----------------|----------------|-----------------|----------------|----------------|
| TTGG     | $26.7 \pm 0.8$ | $59.6 \pm 2.7$ | $48.5 \pm 1.1$  | $88.0 \pm 5.0$ | $2313 \pm 81$  |
| TTGA     | $32.1 \pm 0.7$ | $64.6 \pm 2.1$ | $64.0 \pm 1.5$  | $93.7 \pm 1.2$ | $2466 \pm 86$  |
| CTGG     | $30.8 \pm 1.5$ | $61.6 \pm 1.6$ | $61.7 \pm 4.6$  | $87.3 \pm 1.3$ | $2529 \pm 66$  |
| CTGA     | $36.0 \pm 2.0$ | $67.1 \pm 2.4$ | $78.5 \pm 10.5$ | $94.4 \pm 2.4$ | $2597 \pm 107$ |
| TTAG     | $32.9 \pm 1.3$ | $57.2 \pm 1.6$ | $77.3 \pm 4.2$  | $84.4 \pm 2.0$ | $2245 \pm 70$  |
| TTAA     | $33.7 \pm 0.9$ | $55.7 \pm 0.6$ | $85.5 \pm 4.3$  | $80.4 \pm 1.9$ | $2276 \pm 55$  |
| CTAG     | $34.5 \pm 1.3$ | $56.8 \pm 1.9$ | $87.7 \pm 4.1$  | $78.7 \pm 8.1$ | $2365 \pm 97$  |
| TCGG     | $26.3 \pm 0.3$ | $66.0 \pm 1.5$ | $43.7 \pm 0.9$  | $83.3 \pm 3.0$ | $2546 \pm 132$ |
| TCGA     | $29.6 \pm 1.4$ | $65.4 \pm 0.3$ | $54.4 \pm 4.5$  | $81.1 \pm 2.4$ | $2698 \pm 45$  |
| CCGG     | $27.4 \pm 0.6$ | $65.0 \pm 0.8$ | $47.3 \pm 1.5$  | $83.0 \pm 2.3$ | $2755 \pm 61$  |
| Average  | $31.0 \pm 3.2$ | $61.9 \pm 4.1$ | $64.9 \pm 15.6$ | $85.4 \pm 5.1$ | $2479 \pm 168$ |

Table 12: Averages and standard deviations of tetranucleotide elastic constants.

| Parameter   | Average           |
|-------------|-------------------|
| $A$ (nm)    | $31.8 \pm 1.0$    |
| $A_d$ (nm)  | $58.8 \pm 5.9$    |
| $A'_d$ (nm) | $64.3 \pm 7.1$    |
| $A_s$ (nm)  | $108.1 \pm 158.9$ |
| $C$ (nm)    | $68.0 \pm 12.0$   |
| $B$ (pN)    | $2054 \pm 354$    |
